# Supplementary material
Source: PubMed Central journal article supplement (PMC3726304)
Supplement: NIHMS471016-supplement-03.pdf [file NIHMS471016-supplement-03.pdf]

**Supplementary Table 1. Protein sequences used in this study**

| <b>Sequence Name</b> | <b>Protein Identifier</b> | <b>Sequence Name</b> | <b>Protein Identifier</b> |
|----------------------|---------------------------|----------------------|---------------------------|
| AtTFIIB1             | AT3G10330                 | VcBRF1               | Vocar20005276m            |
| AtTFIIB2             | AT2G41630                 | VcBRP5               | Vocar20005841m            |
| AtBRP2               | AT3G29380                 | VcMEE12              | Vocar20003353m            |
| AtBRP3               | AT4G10680                 | OtTFIIB              | XP_003083158.1            |
| AtBRP4               | AT3G57370                 | OtBRF1               | XP_003082641.1            |
| AtBRP6               | AT5G39230                 | OtBRP5               | XP_003079894.1            |
| AtBRF1               | AT3G09360                 | OtMEE12              | XP_003083384.1            |
| AtBRF2               | AT2G45100                 | CmTFIIB              | CML077C                   |
| AtBRF3               | AT2G01280                 | CmBRF1               | CMA019C                   |
| AtBRF4CTD            | AT4G19550                 | CmBRP1               | CMI217C                   |
| AtBRP1               | AT4G36650                 | CmMEE12              | CMG012C                   |
| AtBRP5               | AT4G35540                 | GtTFIIBnuc           | au.82_g16285              |
| AtMEE12              | AT2G02955                 | GtTFIIBneo           | XP_001713429.1            |
| AtMEE12CTD           | AT4G01340                 | GtBRF1nuc            | e_gw1.33.87.1             |
| PtTFIIB1             | POPTR_0017s12860          | GtBRF1neo            | XP_001713305.1            |
| PtTFIIB2             | POPTR_0006s04700          | GtBRP1nuc            | au.70_g14896              |
| PtTFIIB3             | POPTR_0016s05750          | GtMEE12nuc           | au.87_g16853              |
| PtTFIIB4             | POPTR_0015s07880          | HaTFIIBneo           | XP_001712523.1            |
| PtBRF1               | POPTR_0009s04400          | HaBRF1neo            | XP_001712399.1            |
| PtBRF2               | POPTR_001G246100          | EsTFIIB1             | CBJ26376.1                |
| PtBRP1               | POPTR_0007s12640          | EsTFIIB2             | CBJ26012.1                |
| PtBRP5               | POPTR_0004s08310          | EsBRF1               | CBN75146.1                |
| PtMEE12              | POPTR_0010s17660          | EsMEE12              | CBN78867.1                |
| OsTFIIB1             | LOC_Os05g47480            | PhTFIIB1             | XP_002181720.1            |
| OsTFIIB2             | LOC_Os03g09820            | PhTFIIB2             | XP_002185334.1            |
| OsTFIIB3             | LOC_Os09g36440            | PhBRF1               | XP_002185060.1            |
| OsTFIIB4             | LOC_Os07g32080            | PhTAF1B              | XP_002185731.1            |
| OsBRF1               | LOC_Os05g23940            | HsTFIIB              | NP_001505.1               |
| OsBRP1               | LOC_Os03g10070            | HsBRF1               | NP_001510.1               |
| OsBRP5               | LOC_Os08g42020            | HsBRF2               | NP_060780.2               |
| OsMEE12              | LOC_Os05g28460            | HsTAF1B              | AAA62863.1                |
| SmTFIIB1             | XP_002966817.1            | DmTFIIB              | NP_476888.1               |
| SmTFIIB2             | XP_002961186.1            | DmBRF1               | AAF72066.1                |
| SmBRF1a              | XP_002982504.1            | DmTAF1B              | AAZ66309.1                |
| SmBRF1b              | XP_002968085.1            | CeTFIIB              | NP_503146.1               |
| SmBRF1c              | XP_002982504.1            | CeBRF1               | NP_495526.1               |
| SmBRP1a              | XP_002965603.1            | CeTAF1B              | NP_497287.1               |
| SmBRP1b              | XP_002968085.1            | MbTFIIB              | XP_001748253.1            |
| SmBRP5a              | XP_002972152.1            | MbBRF1               | XP_001742825.1            |
| SmBRP5b              | XP_002977474.1            | MbTAF1B              | XP_001743881.1            |
| SmMEE12              | XP_002981927.1            | ScTFIIB              | NP_015411.1               |
| PpTFIIB1             | Pp1s147_86V6              | ScBRF1               | NP_011762.1               |
| PpTFIIB2             | Pp1s34_263V6              | ScTAF1B              | NP_012509.1               |
| PpBRF1               | Pp1s122_4V6               | MpTFIIB              | XP_003061300.1            |
| PpBRF5               | Pp1s74_175V6              | MpBRF1               | XP_003060954.1            |
| PpMEE12              | Pp1s24_204V6              | MpBRP5               | XP_003063144.1            |
| CrTFIIB              | Cre06.g310450             | MpMEE12              | XP_003060298.1            |
| CrBRF1               | Cre06.g256420             | DdTFIIB              | XP_635486.1               |
| CrBRP5               | Cre01.g056800             | DdBRF1               | XP_640891.1               |
| CrMEE12              | Cre12.g556950             | DdTAF1B              | XP_644217.1               |
| VcTFIIB              | Vocar20007868m            |                      |                           |

**Supplementary Table 1 continued...**

| <b>Sequence Name</b> | <b>Protein Identifier</b> | <b>Sequence Name</b> | <b>Protein Identifier</b> |
|----------------------|---------------------------|----------------------|---------------------------|
| AtRRN3a              | AT1G30590                 | AtTFA2a              | AT3G52270                 |
| AtRRN3b              | AT1G30590                 | AtTFA2b              | AT4G21010                 |
| AtRRN3c              | AT2G39240                 | AtBDP1               | AT4G39160                 |
| AtA34.5              | AT5G64680                 | AtC37                | AT5G49530                 |
| AtA49                | AT3G13940                 | AtC53a               | AT4G25180                 |
| AtTOA1a              | AT1G07470                 | AtC53b               | AT5G09380                 |
| AtTOA1b              | AT1G07480                 | AtC34                | AT5G23710                 |
| AtTOA1c              | AT5G59230                 | AtC82                | AT3G49000                 |
| AtTOA2               | AT4G24440                 | AtC31a               | AT4G01590                 |
| AtTFG1               | AT4G12610                 | AtC31b               | AT4G35680                 |
| AtTFG2a              | AT1G75510                 | AtTFC1a              | AT5G24450                 |
| AtTFG2b              | AT3G52270                 | AtTFC1b              | AT3G49410                 |
| AtTFA1a              | AT1G03280                 | AtTFC3a              | AT1G59453                 |
| AtTFA1b              | AT4G20340                 | AtTFC3b              | AT1G17450                 |
| AtTFA1c              | AT4G20810                 |                      |                           |
