# Supplementary material
Source: PubMed Central journal article supplement (PMC3726304)
Supplement: NIHMS471016-supplement-04.pdf [file NIHMS471016-supplement-04.pdf]

**Supplementary Table S2. *A. thaliana* TFB family pseudogenes.**

| <b>Parent Gene</b> | <b>Pseudogene Number<sup>1</sup></b> | <b>Chromosome</b> | <b>Location</b>   |
|--------------------|--------------------------------------|-------------------|-------------------|
| AtBRF2             | 129                                  | 1                 | 10769596-10770834 |
| AtMEE12            | 271                                  | 1                 | 16040049-16040690 |
| AtMEE12c           | 1357                                 | 4                 | 553491-553782     |
| AtBRF3             | 2378                                 | 1                 | 16035413-16036490 |

<sup>1</sup>Pseudogene accession number (www.pseudogene.org)
